# Supplementary material for: Radical mechanism of a nucleophilic reaction depending on a two-dimensional structure
Source: Royal Society of Chemistry journal article supplement (doi:10.1039/c7cp06708a), 2017-11-24
Supplement: c7cp06708a1.pdf [file c7cp06708a1.pdf]

## **SUPPORTING INFORMATION**

**OF**

### **Radical Mechanism of Nucleophilic Reaction Depending on Two-Dimensional Structure**

*Wenchuan Lai, Yuehui Yuan, Xu Wang, Yang Liu, Yulong Li and Xiangyang Liu\**

State Key Laboratory of Polymer Materials Engineering, College of Polymer Science and Engineering, Sichuan University, Chengdu, Sichuan, 610065, P.R. China;

\*Correspondence to: [lxy6912@sina.com](mailto:lxy6912@sina.com).

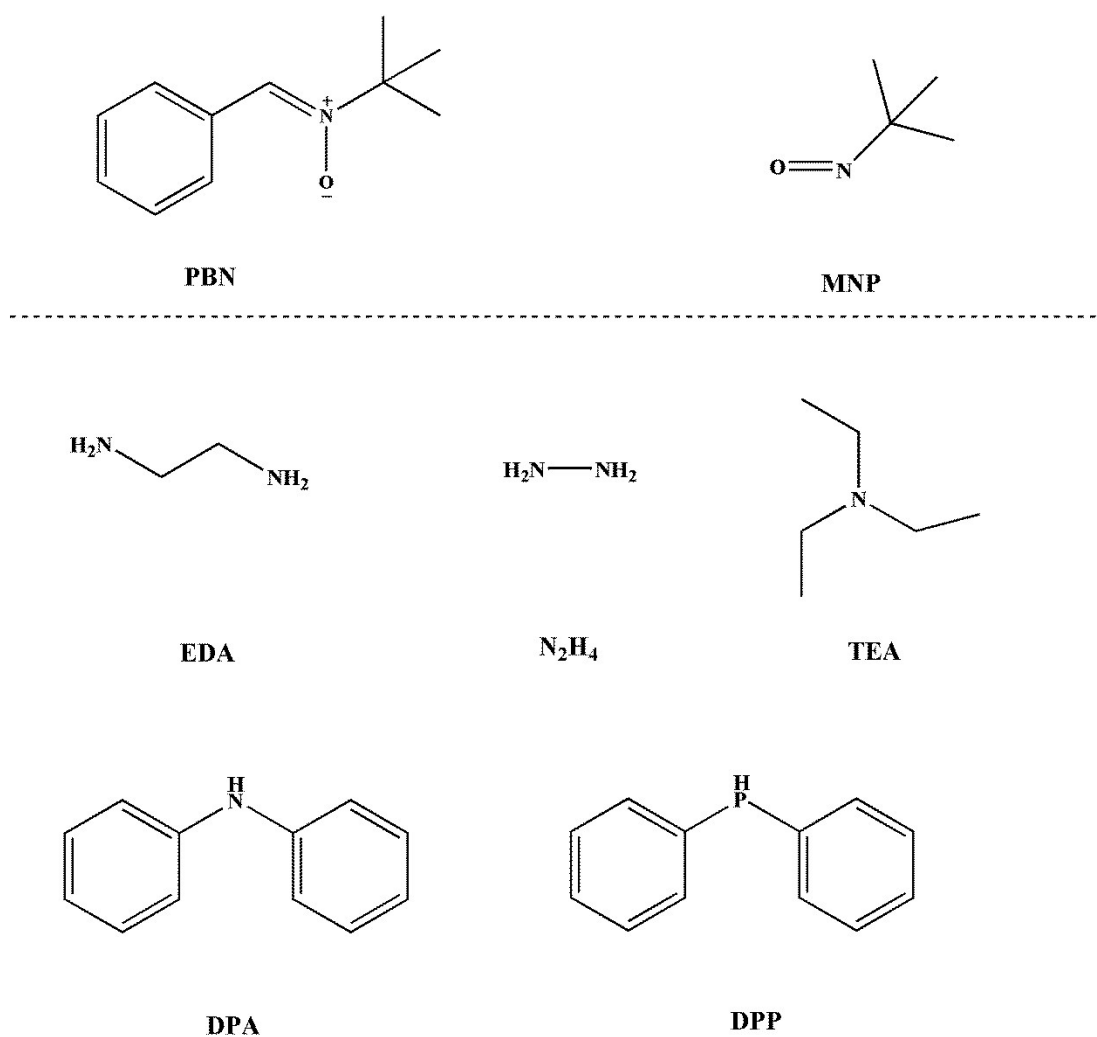

**Fig. S1** The chemical structures of mentioned reagents of radical trappers and nucleophiles.

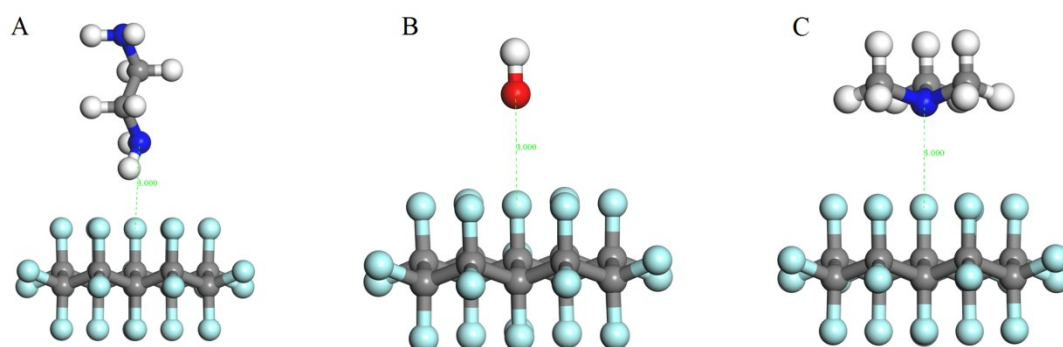

**Fig. S2** The three model structures for calculation of SET reaction for particular nucleophile EDA

(A), OH<sup>-</sup> (B) and TEA (C).

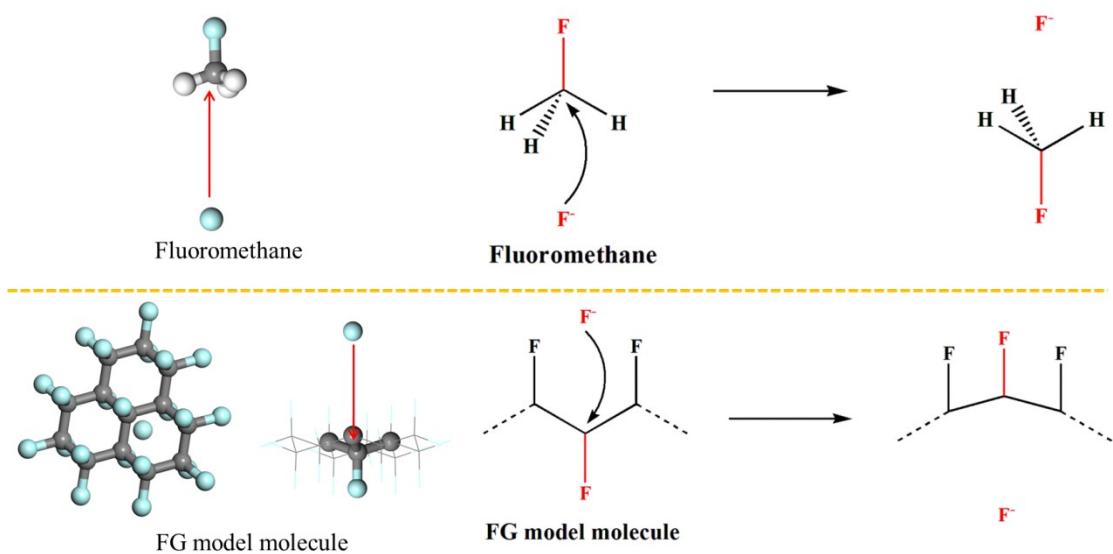

**Fig. S3** The schematic of S<sub>N</sub>2 nucleophilic attacking of FG model molecule and fluoromethane.

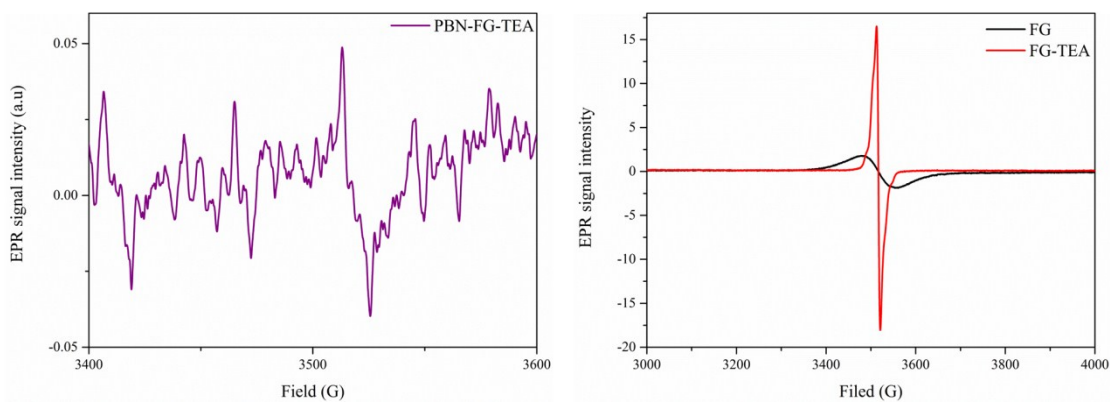

**Fig. S4** EPR spectrum of radical intermediate of PBN-FG-TEA reaction and FG derivative after treatment by TEA.

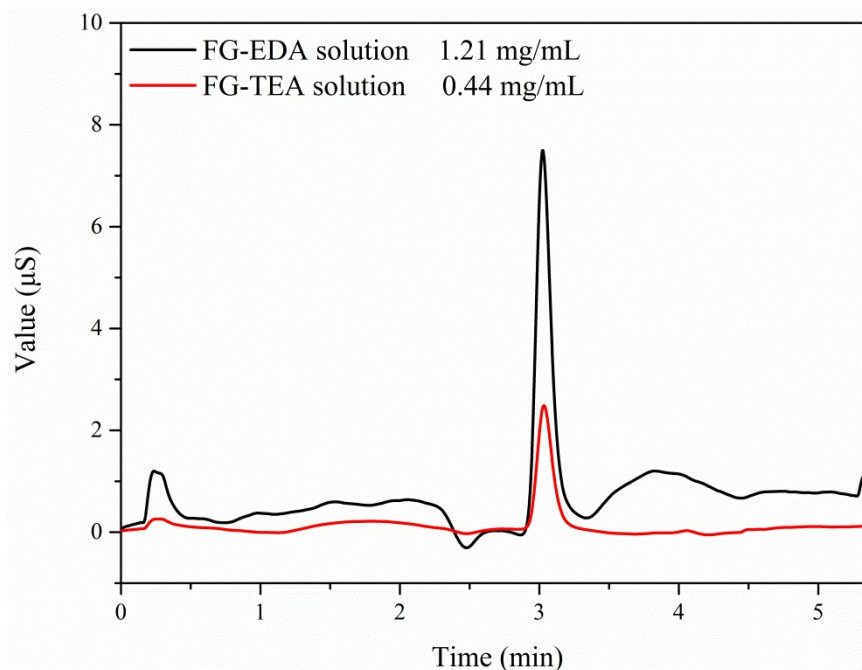

**Fig. S5** Ion chromatography curves of fluorine anion of FG-EDA and FG-TEA solution.

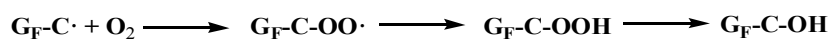

**Scheme S1** The reaction of spin center on graphene nanosheet with trace amount of oxygen purity.

**Table S1** Elemental composition analysis of FG, derivative FG-TEA and G-TEA.

| Sample | C (wt%) | H (wt%) | N (wt%) | Increased H /<br>Increased N | Increased Group                                   |
|--------|---------|---------|---------|------------------------------|---------------------------------------------------|
| FG     | 39.87   | 1.03    | < 0.1   | /                            | /                                                 |
| FG-TEA | 52.53   | 3.16    | 3.13    | 9.33                         | -N(CH <sub>2</sub> CH <sub>3</sub> ) <sub>2</sub> |
| G-TEA  | 71.98   | 2.69    | < 0.1   | /                            | /                                                 |

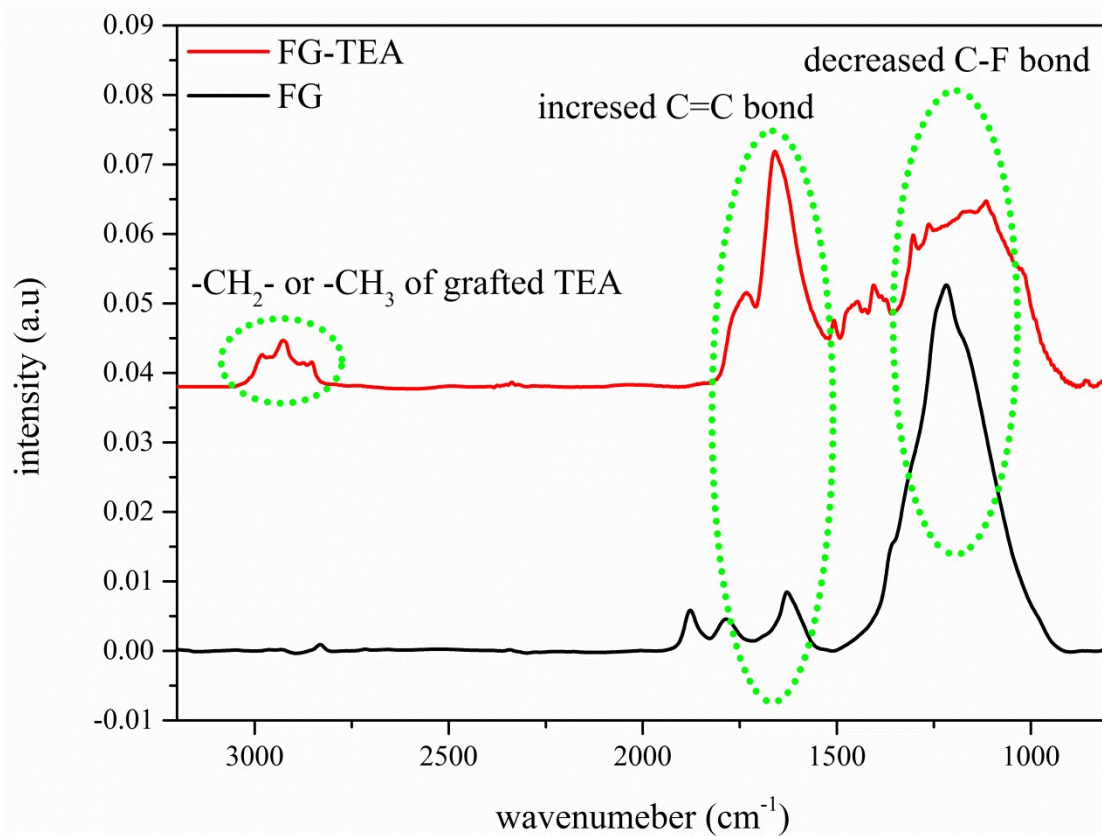

**Fig. S6** FT-IR spectra of FG and FG-TEA samples.

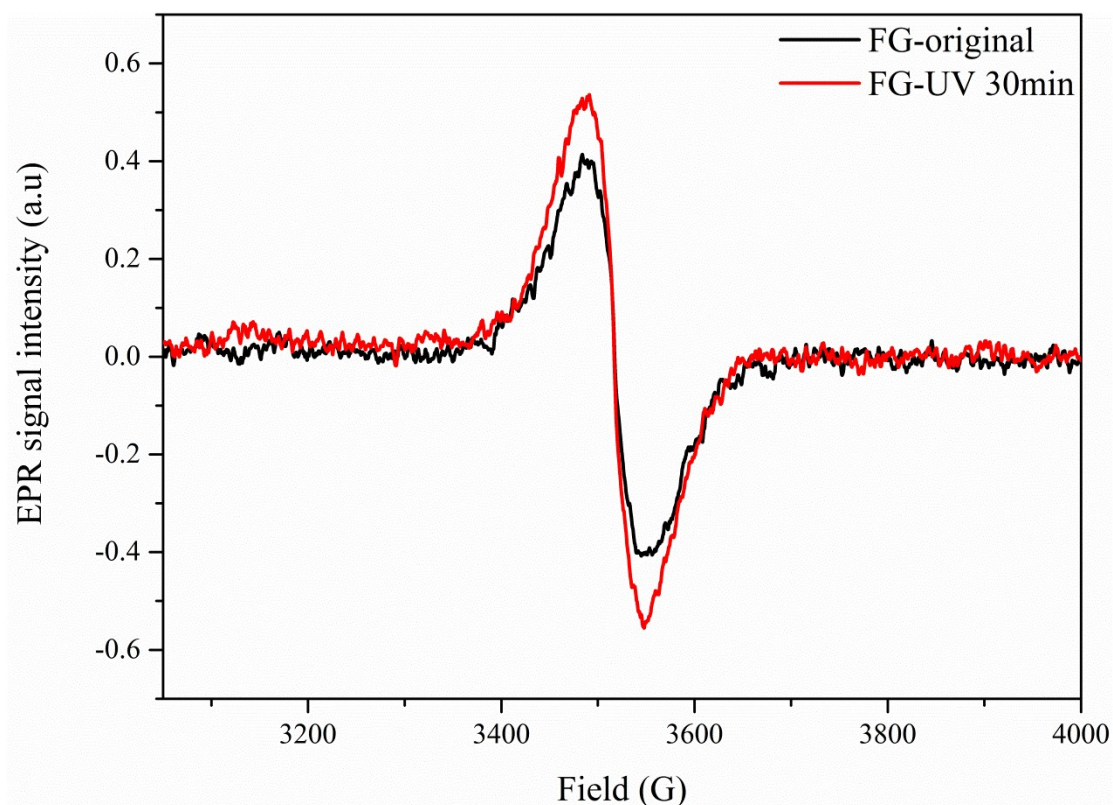

**Fig. S7** The EPR spectra of FG and FG samples under ultraviolet radiation for 30min.

**Table S2** The chemical composition of derivative FG-FM and FG-FM under ultraviolet radiation for 30min based on XPS calculation.

| Sample   | C (at%) | N (at%) | O (at%) | F (at%) |
|----------|---------|---------|---------|---------|
| FG-FM    | 60.66   | 2.86    | 14.06   | 22.42   |
| FG-FM-UV | 61.31   | 3.55    | 14.26   | 20.88   |

### Supplementary data

#### Atomic coordinated of calculated structures

**FG model molecule for defluorination calculations (Fig. 1):**

|   | \$coordinates     |                    |                   |
|---|-------------------|--------------------|-------------------|
| C | -4.89142107440126 | -16.48966061824218 | 4.32169426673277  |
| C | -3.67593826661441 | -15.55902934775437 | 1.72713599593280  |
| C | -3.89476458913298 | -12.59408496621525 | 1.50791171598957  |
| C | -2.39747657704688 | -11.34004869357084 | 3.76018804549774  |
| C | -3.59135235647604 | -12.19708240126655 | 6.38971605917841  |
| C | -3.43144650778676 | -15.21005196318254 | 6.64548728900024  |
| C | -2.68571629313255 | -11.71779650832991 | -1.07207586687707 |
| C | -4.17308834721270 | -12.96129102504427 | -3.37765966394863 |
| C | -4.01221251722127 | -15.97856047734397 | -3.18140434176082 |
| C | -5.17498697054624 | -16.87180182136445 | -0.53196808980951 |
| C | -2.58984528061615 | -8.33930187267240  | 3.57832243028255  |
| C | -1.40647181853282 | -7.40177886738277  | 0.95361635327626  |
| C | -2.88261258207607 | -8.72351406822903  | -1.33613186579047 |
| F | -4.76711445337245 | -19.07008418549229 | 4.51836607888935  |
| F | -7.42685187644139 | -15.98969938295007 | 4.44300307159032  |
| F | -1.18981166261516 | -16.31587277529828 | 1.64079771063338  |
| F | 0.10895217107486  | -12.02988736112821 | 3.70644484488446  |
| F | -6.03159161781500 | -11.38180855878989 | 6.66183068554773  |
| F | -2.34878614882332 | -11.07893387384701 | 8.36925297350692  |
| F | -4.46240227433468 | -15.97937528945455 | 8.89096125452423  |
| F | -0.98131432420332 | -16.01945315480317 | 6.78330275707330  |
| F | -0.18408855107862 | -12.41385726544972 | -1.20881750185906 |
| F | -3.18439371652548 | -12.17246925139128 | -5.63886575064128 |
| F | -6.63684682809852 | -12.17894802434300 | -3.48270008493722 |
| F | -1.58697302691932 | -16.81851413734388 | -3.48119217419633 |
| F | -5.29258104816331 | -17.07845214524117 | -5.14299828385580 |
| F | -5.04403736125516 | -19.45235046391760 | -0.34014342138409 |
| F | -7.71297491218418 | -16.38023291648522 | -0.43178303097099 |
| F | -5.02442853119177 | -7.50341714639840  | 3.83798373125255  |
| F | -1.34468647832406 | -7.21934700140341  | 5.55522132473510  |
| F | 1.13192921723605  | -7.87163575072081  | 0.83878179925582  |
| F | -1.56621402638830 | -4.82605676109739  | 0.76153704614522  |
| F | -1.88878544200528 | -7.93509234959670  | -3.59523901288910 |
| F | -5.33820029915771 | -7.91502838277555  | -1.43421242168126 |
| F | -6.39930151353373 | -11.88074808530662 | 1.60139522584293  |
|   | \$end             |                    |                   |

**SET reaction for EDA (step 1 of Scheme 1 and Table 1):**

Scoordinates

|   |                   |                   |                    |
|---|-------------------|-------------------|--------------------|
| C | -3.20727996852732 | -4.54711497564740 | 1.85508264899755   |
| C | -0.26619378560737 | -4.45282452817222 | 2.26590886290676   |
| C | 0.80118836629236  | -1.69712682948364 | 1.86888484389736   |
| C | -0.61214303713171 | 0.29191100419172  | 3.58345600736138   |
| C | -3.55248037450066 | 0.18174647743164  | 3.17000479000975   |
| C | -4.64318236283353 | -2.54336038387842 | 3.47360420381882   |
| C | 3.75505573642515  | -1.58027995713530 | 2.23794721660376   |
| C | 5.14925528043922  | -3.57056538043947 | 0.52937448416666   |
| C | 4.08191599319719  | -6.29863902672809 | 0.87111983205608   |
| C | 1.15190847519392  | -6.42880681474728 | 0.55841852968926   |
| C | 0.46388162413286  | 3.03800973698318  | 3.21414765467447   |
| C | 3.39886025757026  | 3.16946232711804  | 3.47464557519452   |
| C | 4.79273769020743  | 1.16975509218206  | 1.81755533944093   |
| F | -4.07572375752807 | -6.86346694807440 | 2.53740447357904   |
| F | -3.79345452530965 | -4.14436371075865 | -0.61284850401952  |
| F | 0.15426667538571  | -5.18459050769085 | 4.73678180360521   |
| F | -0.20389472146180 | -0.30468696820154 | 6.09278533390690   |
| F | -4.17786592445602 | 1.02327380875186  | 0.81662926176790   |
| F | -4.70568151307093 | 1.68520661661116  | 4.89692594108968   |
| F | -7.09939295065350 | -2.51489031809984 | 2.73147198046345   |
| F | -4.54407481071367 | -3.21834145394381 | 5.94574819131648   |
| F | 4.33028343479828  | -2.20335064738959 | 4.70763247766073   |
| F | 7.63642715431917  | -3.62386419683665 | 1.15915808632929   |
| F | 4.94623557965206  | -2.93731696164721 | -1.95235223459098  |
| F | 4.72756809050402  | -7.17286648505083 | 3.19454508905318   |
| F | 5.15338189994481  | -7.81331421046902 | -0.90091385129618  |
| F | 0.40618443049551  | -8.79383697186228 | 1.21956148872010   |
| F | 0.59855820419998  | -6.05514307042037 | -1.92045741815607  |
| F | -0.16238804174898 | 3.95598003140615  | 0.89289216798601   |
| F | -0.54572772429753 | 4.58394885398190  | 4.99363413440479   |
| F | 4.04410934243505  | 2.83444087044574  | 5.93225012893923   |
| F | 4.17000657617888  | 5.50477285973102  | 2.73551259286391   |
| F | 7.27953769055241  | 1.24443461955675  | 2.43594585460557   |
| F | 4.54820596367224  | 1.87381951407345  | -0.64880944982675  |
| F | 0.31824812286493  | -1.05003422607707 | -0.63099931589117  |
| N | -4.62818679076797 | 7.38963432323227  | -8.57669551781840  |
| C | -3.99086816457441 | 5.15799692861604  | -7.07776700235784  |
| C | -1.31690649139345 | 5.10789699713954  | -5.96587253299760  |
| N | -0.83152697247634 | 2.66490056491299  | -4.76660539139000  |
| H | -3.43139162825037 | 7.51907545486462  | -10.08746931851057 |
| H | -4.35079097325330 | 8.99203239082495  | -7.53485251372053  |
| H | -4.24331362570461 | 3.46302114225513  | -8.25411176984873  |
| H | -5.37730825123431 | 5.00069374491665  | -5.52788869455978  |



|   |                   |                  |                   |
|---|-------------------|------------------|-------------------|
| H | -1.08667345695152 | 6.76117565907848 | -4.68709739455772 |
| H | 0.06362351082561  | 5.35548538024835 | -7.50838443324740 |
| H | -2.05943304578905 | 2.39999402105772 | -3.30128202489857 |
| H | 0.93444280083877  | 2.63011616070145 | -3.99462162742100 |

Send

**SET reaction for OH<sup>-</sup> (step 1 of Scheme 1 and Table 1):**

|   | Scoordinates      |                   |                   |
|---|-------------------|-------------------|-------------------|
| C | 0.02923763284630  | -4.92074174370322 | 0.10144608630981  |
| C | 1.43210498209913  | -2.46159122958210 | 1.00951208989592  |
| C | 0.02997989270176  | 0.00179106730346  | 0.07921091487789  |
| C | -2.84835881107071 | 0.00223258291530  | 0.87253606462374  |
| C | -4.22890854014078 | -2.46821728022911 | -0.03879450698371 |
| C | -2.83394605699827 | -4.92350724450358 | 0.82070737578331  |
| C | 1.42661530313958  | 2.47785132322255  | 0.98448567581437  |
| C | 4.29051447353069  | 2.46669386428536  | 0.18147778294310  |
| C | 5.69341696224081  | 0.01236591233796  | 1.03003193991664  |
| C | 4.29543687560477  | -2.45218255910577 | 0.20566099744823  |
| C | -4.23601713424353 | 2.45846225507941  | -0.06733885411681 |
| C | -2.84410965416427 | 4.92569022588756  | 0.76257878034834  |
| C | 0.01957486979521  | 4.92279296393313  | 0.04288202049687  |
| F | 1.11180207498081  | -6.96211977728652 | 1.21011922080300  |
| F | 0.21028672763850  | -5.17718799503525 | -2.45014354839636 |
| F | 1.40564355724141  | -2.52367783748861 | 3.61499160575718  |
| F | -3.00697029374040 | 0.01454820775135  | 3.47393448448177  |
| F | -4.41290492171739 | -2.51234942258780 | -2.59804759339799 |
| F | -6.58849991995914 | -2.52881397892579 | 0.96161130830013  |
| F | -3.95092472867314 | -6.92949826667026 | -0.31983036976240 |
| F | -3.06522331441262 | -5.18719701071451 | 3.36092705562898  |
| F | 1.39651931322361  | 2.56620376366366  | 3.58931900927582  |
| F | 5.47845623891708  | 4.45881516218914  | 1.27065784821586  |
| F | 4.51735493746247  | 2.66385707704403  | -2.37098066657711 |
| F | 5.95434655478932  | 0.02350221201173  | 3.57938161232698  |
| F | 8.02728634246772  | 0.00910690011143  | -0.03477219280132 |
| F | 5.48681626446186  | -4.43208589699910 | 1.31247793522706  |
| F | 4.52194645227152  | -2.67718695946534 | -2.34707930094408 |
| F | -4.42531924505922 | 2.46865176228031  | -2.62367710790315 |
| F | -6.59473306630914 | 2.52238804082680  | 0.93981290737776  |
| F | -3.07621753502768 | 5.21995842342499  | 3.30005873525799  |
| F | -3.96567716668573 | 6.91437017000128  | -0.40167915144845 |
| F | 1.09747803410131  | 6.97999606675428  | 1.12988074466793  |

|   |                   |                   |                   |
|---|-------------------|-------------------|-------------------|
| F | 0.20058177645166  | 5.14437526870157  | -2.50750437456291 |
| F | 0.10882970737333  | -0.01011512569090 | -2.53887965804290 |
| O | -1.07500389168308 | 0.39326565610297  | -8.10866961846876 |
| H | 0.41858530465651  | -0.48044657973015 | -7.42630525237275 |

Send

**SET reaction for TEA (step 1 of Scheme 1 and Table 1):**

|   | Scoordinates      |                   |                   |
|---|-------------------|-------------------|-------------------|
| C | -0.05050761721124 | -5.02374336185227 | 2.72438252361717  |
| C | 1.33628842393075  | -2.49818594795768 | 3.44474990002725  |
| C | -0.13550722997235 | -0.11309605889778 | 2.43881597253394  |
| C | -2.98297611987791 | -0.10893847811936 | 3.31709347299050  |
| C | -4.35308279719290 | -2.64448708946557 | 2.59814913972104  |
| C | -2.88867128969719 | -5.02723979737942 | 3.53234437320935  |
| C | 1.25291068751368  | 2.42686387242283  | 3.13999804241003  |
| C | 4.08503946670713  | 2.41013569362122  | 2.24451512982652  |
| C | 5.55902061910940  | 0.02798400365279  | 3.16585849656548  |
| C | 4.16841193456776  | -2.49685741757948 | 2.54943512771544  |
| C | -4.43771296660684 | 2.26836490782607  | 2.29192667266691  |
| C | -3.06146890859269 | 4.79892407906391  | 2.91746804943853  |
| C | -0.21945894613344 | 4.79661245268425  | 2.12287148817634  |
| F | 1.09938880799589  | -6.98436293092159 | 3.91801934339838  |
| F | 0.05517585301124  | -5.43264350831338 | 0.19100326495012  |
| F | 1.40073554354204  | -2.41848014971245 | 6.05645964261165  |
| F | -3.06808099794308 | 0.05304346148536  | 5.92426489844600  |
| F | -4.64202002630911 | -2.83372004764344 | 0.05302446217890  |
| F | -6.67660598357725 | -2.68539739429006 | 3.69098386539967  |
| F | -4.01021228180222 | -7.10849843158061 | 2.53317810865940  |
| F | -3.04084160685478 | -5.16654879726729 | 6.08914157344132  |
| F | 1.31563297661192  | 2.67316227367666  | 5.74173609896505  |
| F | 5.27872946905067  | 4.47867577936143  | 3.18182340931602  |
| F | 4.22778701414177  | 2.48486799726713  | -0.32375014551553 |
| F | 5.93478172321929  | 0.19131072150093  | 5.69740157071783  |
| F | 7.84630661574212  | -0.00440750461735 | 1.99975259214243  |
| F | 5.43031070188331  | -4.38982761462486 | 3.73603023458092  |
| F | 4.31866120716928  | -2.88393260112780 | 0.01058824130300  |
| F | -4.72334850592171 | 2.13435878558057  | -0.26041843108033 |
| F | -6.76653877363080 | 2.36258631793673  | 3.36733924219096  |
| F | -3.23233225484925 | 5.25883904711794  | 5.43449217068968  |
| F | -4.24750802401712 | 6.69645691779288  | 1.65877349796107  |
| F | 0.85404435182831  | 6.92779667222964  | 3.06657009954519  |

|   |                   |                   |                    |
|---|-------------------|-------------------|--------------------|
| F | -0.11168259288916 | 4.90344619352984  | -0.44517606614967  |
| F | -0.15214331675071 | -0.27995239208438 | -0.18855439910036  |
| N | -0.04692302029118 | -0.41570352522823 | -7.11028413395160  |
| C | -0.22990304857626 | -0.86443397724640 | -9.81183372041009  |
| C | -1.36985623569109 | 1.87083709161120  | -6.35840431584965  |
| C | 2.55990041776757  | -0.44359122276851 | -6.24632420206256  |
| H | 0.65934330292214  | -2.68142607436715 | -10.28377797821826 |
| H | 0.71107751490496  | 0.63761153563267  | -10.94755872279903 |
| H | -2.22600113149090 | -0.94150603773506 | -10.37902417168869 |
| H | -3.35850395241548 | 1.75959375233171  | -6.94700026753306  |
| H | -0.53518811509636 | 3.60438411003469  | -7.20975085497767  |
| H | -1.31028108892251 | 2.07424326595736  | -4.29737417558496  |
| H | 3.70981749390180  | 1.10558158979585  | -7.08663868069959  |
| H | 3.44683234231220  | -2.25162762432399 | -6.75781829605577  |
| H | 2.62716036259058  | -0.24707253700956 | -4.18450214182957  |

\$end

**S<sub>N</sub>2 substitution of fluoromethane (Fig. S2 and Table 2):**

| \$coordinates |                   |                   |                   |
|---------------|-------------------|-------------------|-------------------|
| C             | 1.45512706194565  | -0.08848793191455 | -0.03888692026040 |
| H             | 0.84129088500801  | -2.00432158897497 | 0.48584190088482  |
| H             | 0.78091808673179  | 0.39448250744663  | -1.94546255392145 |
| H             | 0.77654438931481  | 1.30142331707532  | 1.34986427310448  |
| F             | 4.09623030387687  | -0.03499576251971 | -0.05064555210056 |
| F             | -7.95011072498740 | 0.43189945888728  | 0.19928885229311  |

\$end

**S<sub>N</sub>2 substitution of FG model molecule (Fig. S2 and Table 2):**

| \$coordinates |                   |                   |                   |
|---------------|-------------------|-------------------|-------------------|
| C             | -4.22643369244653 | -2.53941742874465 | -0.50417259011714 |
| C             | -1.24949304222758 | -2.50033332690146 | -0.56845941370988 |
| C             | -0.19939205779570 | 0.29136609410467  | -0.49439680443624 |
| C             | -1.26950222588837 | 1.80743446142371  | 1.84444304115902  |
| C             | -4.24630596544956 | 1.75699868404084  | 1.90270470354881  |
| C             | -5.32549474067412 | -0.99220898837694 | 1.76550569059389  |
| C             | 2.78436833621861  | 0.34364351920047  | -0.56467210964785 |
| C             | 3.83830503004722  | -1.15432854728672 | -2.91148432615005 |
| C             | 2.76884189095167  | -3.90802335927048 | -3.05821240403272 |

|   |                   |                   |                   |
|---|-------------------|-------------------|-------------------|
| C | -0.18586665486087 | -4.00217273302125 | -2.90993587700432 |
| C | -0.22265082772911 | 4.59358255304520  | 1.90033191807284  |
| C | 2.73180241797367  | 4.68584959327957  | 1.77585405195231  |
| C | 3.82238723761760  | 3.13238557929222  | -0.49317406092651 |
| F | -5.02962389097652 | -4.95666157284943 | -0.25234353686192 |
| F | -5.19637887437159 | -1.56695966318435 | -2.67131752492317 |
| F | -0.44556565208760 | -3.77131382128673 | 1.54803476846928  |
| F | -0.47018593945845 | 0.67224252242875  | 4.03915470730245  |
| F | -5.21845533526517 | 3.09155198601005  | -0.06150778479442 |
| F | -5.06047726422613 | 2.80203236786855  | 4.09361260611565  |
| F | -7.86774864833238 | -0.84337611841844 | 1.47653078411819  |
| F | -4.81124742910036 | -2.21345071196327 | 3.95190664359577  |
| F | 3.71181966629013  | -0.84823995221073 | 1.54803048068071  |
| F | 6.38666615648597  | -1.32186997611349 | -2.72661025938496 |
| F | 3.24484277092002  | 0.04664687839199  | -5.09989656190992 |
| F | 3.75618048440721  | -5.29750691221565 | -1.15428584514547 |
| F | 3.49273955166325  | -4.93105026396575 | -5.29372825365064 |
| F | -0.87307690802017 | -6.46030990040511 | -2.70925976164505 |
| F | -1.12304985715761 | -3.05761613307933 | -5.10353020478183 |
| F | -1.14532103165165 | 5.95203717151457  | -0.07167543542296 |
| F | -0.94168868732395 | 5.71819184999567  | 4.08466532739055  |
| F | 3.70250463552275  | 3.78800723290709  | 3.96477957512225  |
| F | 3.44996467296849  | 7.12832661916287  | 1.48963089662969  |
| F | 6.36924555368627  | 3.07638353990886  | -0.23812366524534 |
| F | 3.23461325065815  | 4.37616918441946  | -2.65899705293960 |
| F | -1.04520546182220 | 1.49949241729516  | -2.65399227581401 |
| F | 2.85888253145462  | -4.39750285066509 | 6.81459055379261  |

Send
